# Supplementary material for: dCas9 regulator to neutralize competition in CRISPRi circuits
Source: PubMed Central journal article supplement (PMC7966764; doi:10.1038/s41467-021-21772-6), 2021-03-16
Supplement: 41467_2021_21772_MOESM6_ESM.pdf [file 41467_2021_21772_MOESM6_ESM.pdf]

**Title:** Supplementary Software

**Description:** The zip file including codes to produce simulation results in Figures 2 and 3.

**Title:** Supplementary Data 1:

**Description:** The zip file including DNA sequences of plasmids and the list of all primers used
